# Supplementary material
Source: HighWire-hosted journal article supplement (https://bibliotheek.ehb.be/content/suppl/2023/04/04/bmjnph-2022-000431)
Supplement: bmjnph-2022-000431supp001_data_supplement.pdf [file bmjnph-2022-000431supp001_data_supplement.pdf]

Table S1-1a. Apoptosis rate of HF after exposure to three disinfectants at various concentrations (%)

|       | Povidone iodine |                | Chlorhexidine acetate |                | PHMB            |                |
|-------|-----------------|----------------|-----------------------|----------------|-----------------|----------------|
|       | Early apoptosis | Late apoptosis | Early apoptosis       | Late apoptosis | Early apoptosis | Late apoptosis |
| 1/512 | 4.34 ± 0.36     | 93.83 ± 1.86   | 0.78 ± 0.57           | 13.93 ± 2.06   | 1.71 ± 0.73     | 13.90 ± 2.98   |
| 1/64  | -               | -              | 1.54 ± 0.36           | 15.93 ± 2.96   | 1.03 ± 0.32     | 15.83 ± 2.12   |
| 1/8   | -               | -              | 1.69 ± 0.23           | 74.80 ± 2.56*  | 8.69 ± 2.05*    | 81.43 ± 3.39*  |

-unable to detect; \*statistically significant difference compared with previous dilution;  $P < 0.05$

Table S1-1b. Apoptosis rate of HaCat after exposure to three disinfectants at various concentrations (%)

|       | Povidone iodine |                | Chlorhexidine acetate |                | PHMB            |                |
|-------|-----------------|----------------|-----------------------|----------------|-----------------|----------------|
|       | Early apoptosis | Late apoptosis | Early apoptosis       | Late apoptosis | Early apoptosis | Late apoptosis |
| 1/512 | 0.16 ± 0.07     | 99.43 ± 0.35   | 0.96 ± 0.35           | 8.78 ± 0.17    | 4.08 ± 0.45     | 10.39 ± 1.06   |
| 1/64  | -               | -              | 2.62 ± 0.89*          | 20.90 ± 2.15*  | 3.48 ± 0.54     | 20.17 ± 5.70*  |
| 1/8   | -               | -              | 2.22 ± 0.20           | 86.77 ± 5.49*  | 2.15 ± 0.16     | 87.50 ± 3.17*  |

-unable to detect; \*statistically significant difference compared with previous dilution;  $P < 0.05$

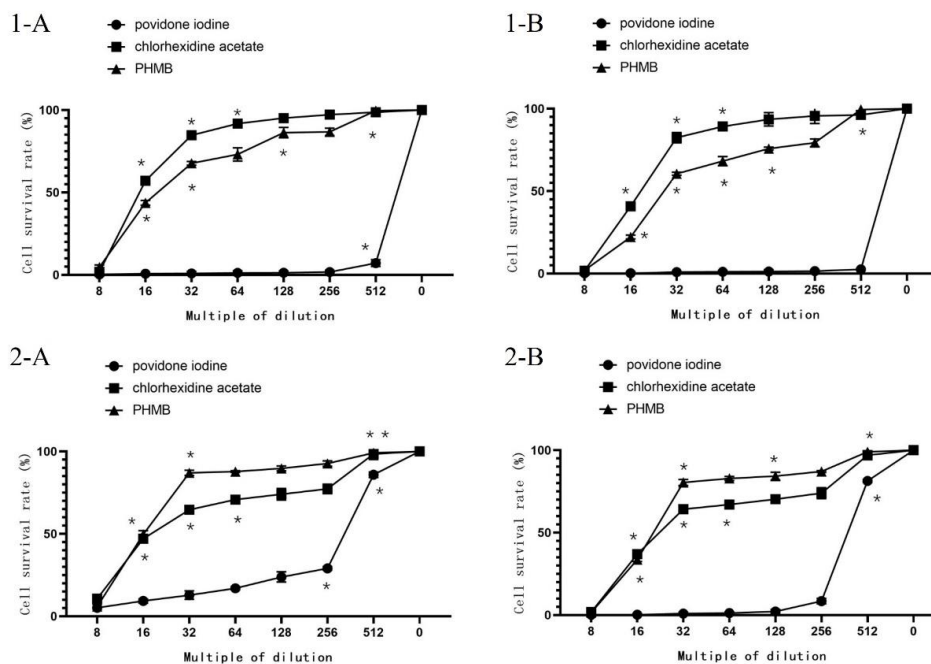

Figure S1. Variation in direct contact cytotoxicity of povidone iodine, chlorhexidine acetate, and PHMB with concentration. \*Compared with the previous dilution ratio, there was a significant difference ( $P < 0.05$ ). Figure S1-1: HF. Figure S1-2: HaCaT. **A:** Cytotoxicity after 1 hour. **B:** Cytotoxicity after 2 hour.

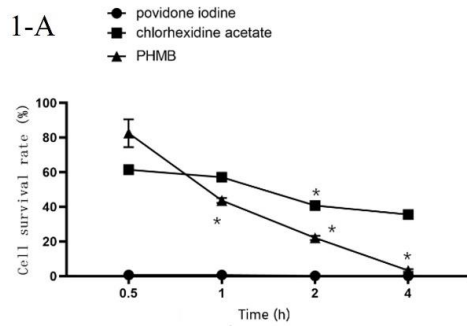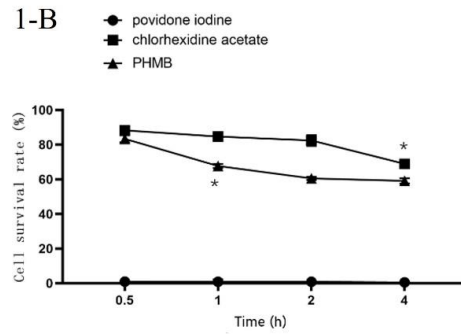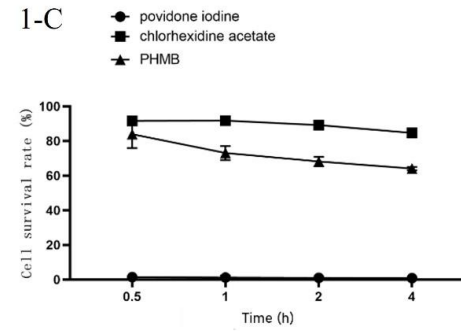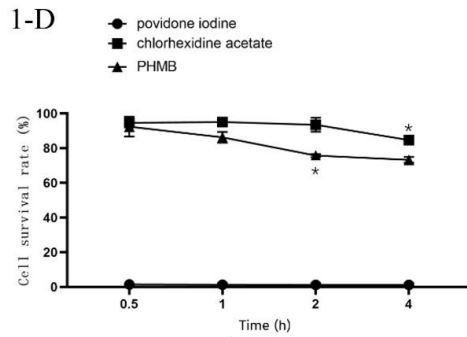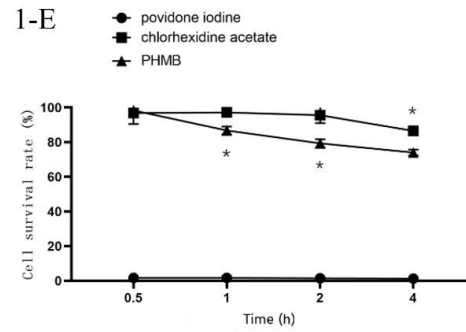

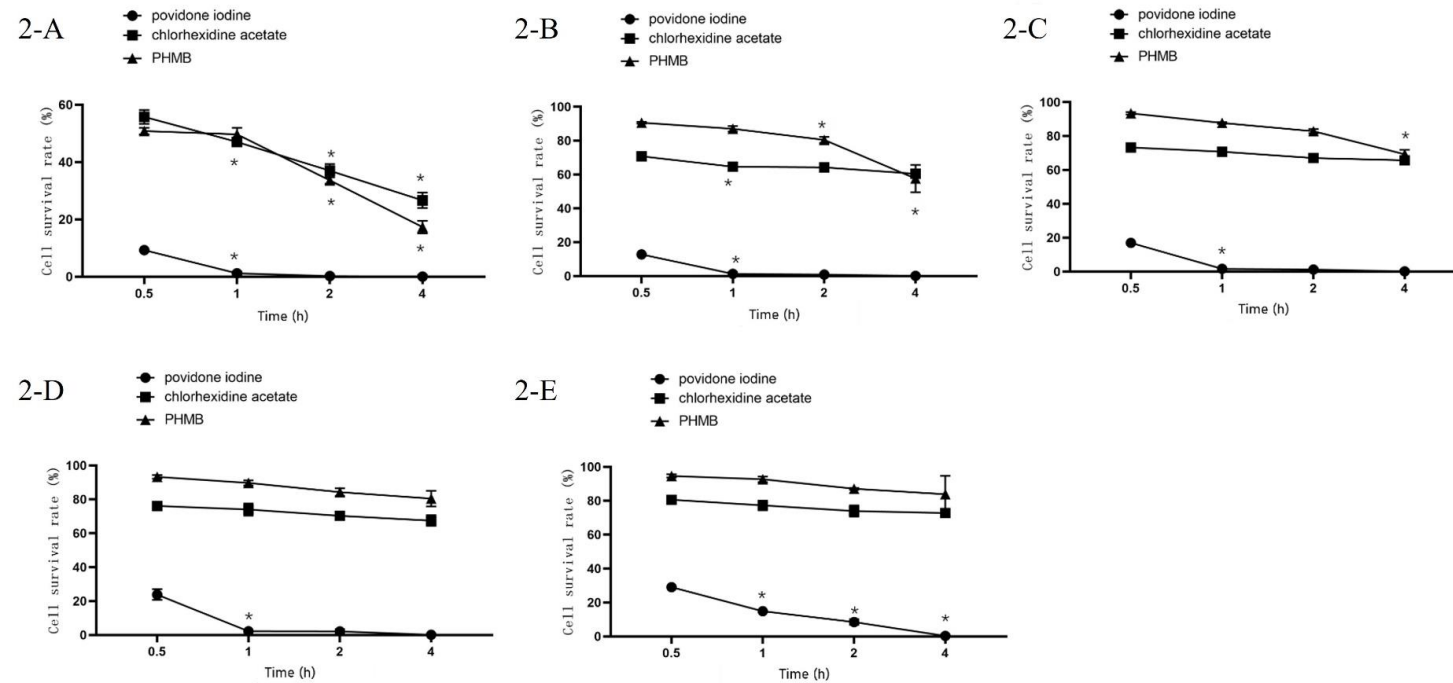

Figure S2. Direct-contact cytotoxicity of various dilutions of povidone iodine, chlorhexidine acetate, and PHMB. \*Compared with the previous period, there were significant changes,  $P < 0.05$ . Figure S2-1: HF. Figure S2-2: HaCaT. **A:** Cytotoxicity of three disinfectants at 1/16 dilution. **B:** Cytotoxicity of three disinfectants at 1/32 dilution. **C:** Cytotoxicity of three disinfectants at 1/64 dilution. **D:** Cytotoxicity of three disinfectants at 1/128 dilution. **E:** Cytotoxicity of three disinfectants at 1/256 dilution.
